# Supplementary material
Source: PubMed Central journal article supplement (PMC9310778)
Supplement: FSB2-36-0-s002.pdf [file FSB2-36-0-s002.pdf]

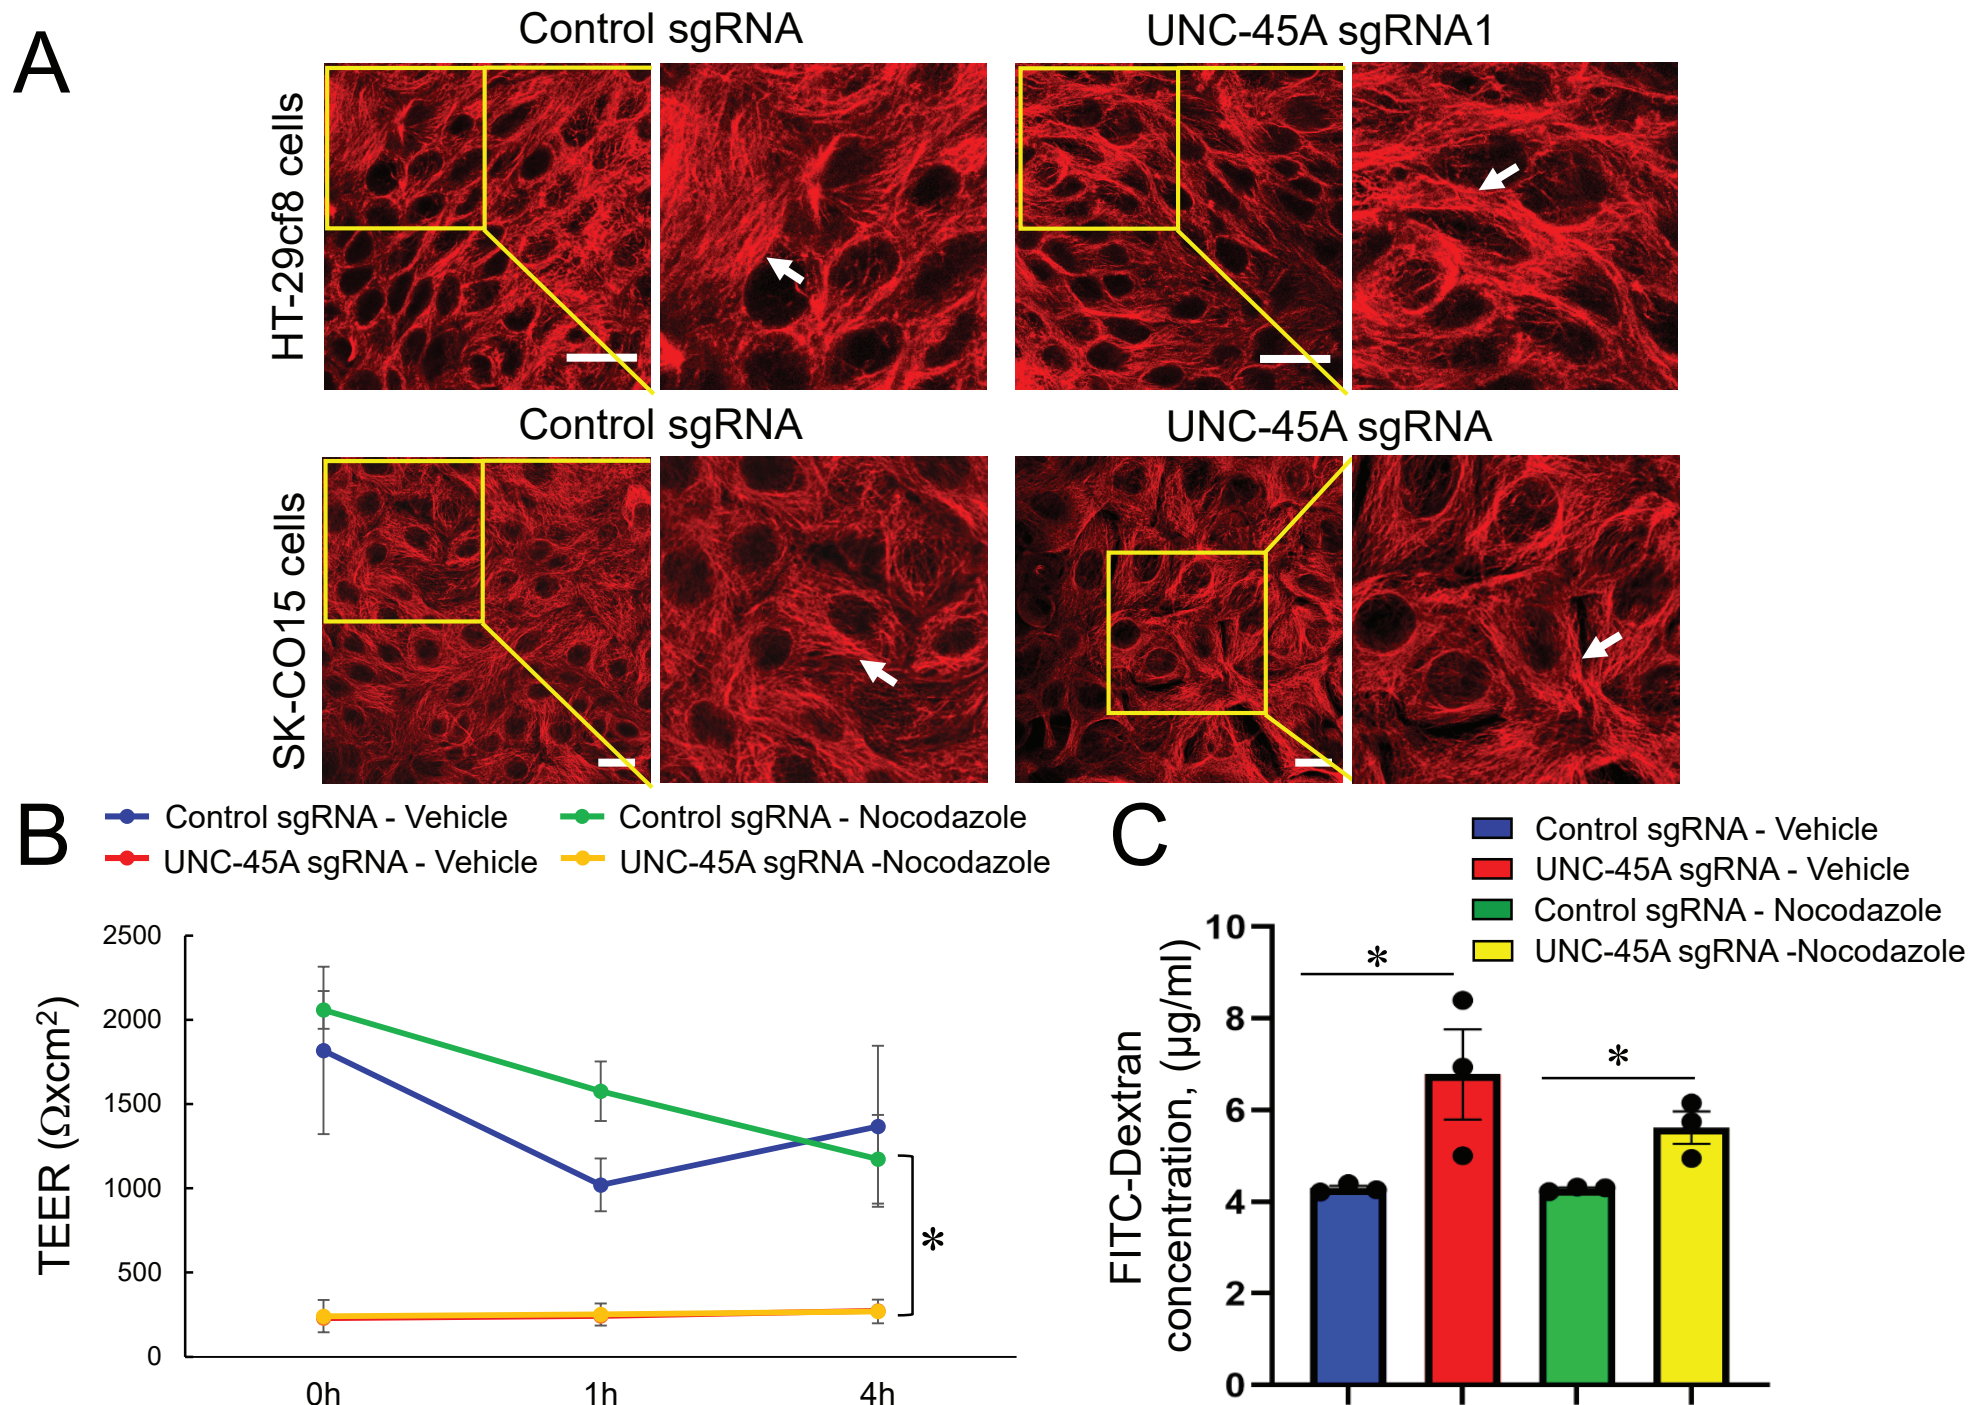

**Figure S5. UNC-45A-dependent regulation of epithelial barrier does not depend on microtubules.** (A) Confocal microscopy images of control and UNC-45A knockout HT-29cf8 and SK-CO15 cells immunolabeled for alpha-tubulin. Arrows point on normal organization of the apical microtubule network in control and UNC-45A knockout cells. Scale bar, 20  $\mu\text{m}$ . (B,C) Transepithelial electrical resistance (TEER) and FITC dextran flux in control and UNC-45A-depleted SK-CO15 cell monolayers treated with nocodazole (30  $\mu\text{M}$ ). Means  $\pm$  SE (n=3); \*P< 0.05. Scale bars, 20  $\mu\text{m}$ .
